# Supplementary material for: Ultrasound-mediated gene delivery of factor VIII plasmids for hemophilia A gene therapy in mice
Source: PubMed Central journal article supplement — Mol Ther Nucleic Acids. 2022 Jan 10;27:916–26. doi: 10.1016/j.omtn.2022.01.006 (PMC8803955; doi:10.1016/j.omtn.2022.01.006), 2022-01-10
Supplement: mmc1.pdf [file mmc1.pdf]

**OMTN, Volume 27**

**Supplemental information**

**Ultrasound-mediated gene delivery**

**of factor VIII plasmids**

**for hemophilia A gene therapy in mice**

**Shuxian Song, Meghan J. Lyle, Misty L. Noble-Vranish, Dominic M. Min-Tran, James Harrang, Weidong Xiao, Evan C. Unger, and Carol H. Miao**

a

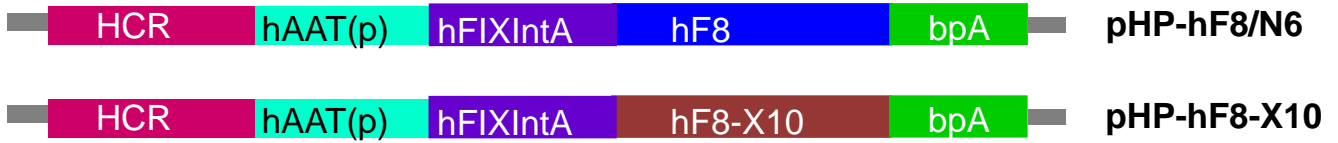

b

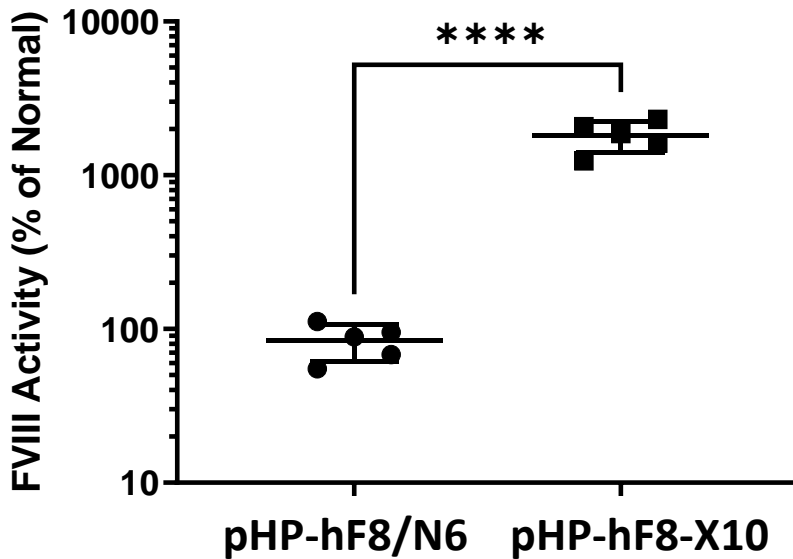

**Supplemental figure 1. Comparison of FVIII expression in Hema mice following hydrodynamic injection of FVIII variant plasmids.** Two groups of mice (n=5) were injected hydrodynamically with two different FVIII variant plasmids, pHP-hF8/N6 and pHP-hF8-X10, respectively at 100  $\mu$ g for each mouse. Blood was collected at day 1 post injection. (a) Structure of two hF8 variant plasmids. (b) FVIII activity in mouse plasma was examined by a modified aPTT assay.
